# Supplementary material for: Discovery and Validation of a Serologic Autoantibody Panel for Early Diagnosis of Esophageal Squamous Cell Carcinoma
Source: Oxford University Press journal article supplement (doi:10.1158/1055-9965.epi-18-1269), 2019-06-25
Supplement: 10559965epi181269-sup-212595_3_supp_5492525_pqtsgd.xlsx [file 10559965epi181269-sup-212595_3_supp_5492525_pqtsgd.xlsx]

## Sheet: Sheet3
Supplementary Table 1. Characteristics of all samples used in this study.
#	Sample ID	Gender	Age	Stage	Smoking	Drinking	Phase	Group
1	S333	Male	65	0	No	No	I	ESCC
2	S237	Male	53	0	No	No	I	ESCC
3	S297	Male	53	0	No	No	I	ESCC
4	S192	Male	51	0	No	No	I	ESCC
5	S117	Male	57	0	Yes	No	I	ESCC
6	S88	Male	65	0	No	No	I	ESCC
7	S160	Male	51	0	Yes	Yes	I	ESCC
8	S301	Female	38	0	No	No	I	ESCC
9	S306	Female	38	0	No	No	I	ESCC
10	S343	Male	76	0	No	No	I	ESCC
11	S44	Male	49	0	No	No	I	ESCC
12	S36	Male	57	0	Yes	No	I	ESCC
13	S360	Male	62	0	Yes	No	I	ESCC
14	S133	Male	70	0	No	No	I	ESCC
15	S154	Female	62	0	No	No	I	ESCC
16	S96	Female	57	0	No	No	I	ESCC
17	S150	Male	62	0	No	No	I	ESCC
18	S59	Male	43	0	No	Yes	I	ESCC
19	S205	Female	66	0	No	No	I	ESCC
20	S94	Male	48	0	Yes	No	I	ESCC
21	S122	Male	62	0	No	No	I	ESCC
22	S134	Male	62	0	No	No	I	ESCC
23	S302	Male	56	0	Yes	No	I	ESCC
24	S126	Male	70	0	No	No	I	ESCC
25	S257	Female	66	0	No	No	I	ESCC
26	S200	Female	64	0	No	No	I	ESCC
27	S155	Male	78	0	Yes	No	I	ESCC
28	S278	Male	68	0	Yes	Yes	I	ESCC
29	S391	Female	59	0	No	No	I	ESCC
30	S148	Male	53	0	Yes	No	I	ESCC
31	S139	Female	62	0	No	No	I	ESCC
32	S407	Male	61	0	Yes	No	I	ESCC
33	S364	Male	55	0	No	No	I	ESCC
34	S336	Female	70	0	No	No	I	ESCC
35	S405	Female	59	0	No	No	I	ESCC
36	S309	Male	51	0	Yes	Yes	I	ESCC
37	S269	Female	51	0	No	No	I	ESCC
38	S378	Female	59	0	No	No	I	ESCC
39	S406	Male	54	0	Yes	No	I	ESCC
40	S385	Male	56	0	Yes	Yes	I	ESCC
41	S82	Male	57	Ⅰ	Yes	No	I	ESCC
42	S39	Male	57	Ⅰ	Yes	Yes	I	ESCC
43	S89	Female	48	Ⅰ	No	No	I	ESCC
44	S147	Male	59	Ⅰ	No	No	I	ESCC
45	S114	Female	61	Ⅰ	No	No	I	ESCC
46	S244	Male	66	Ⅰ	Yes	No	I	ESCC
47	S247	Male	56	Ⅰ	Yes	Yes	I	ESCC
48	S93	Male	66	Ⅰ	No	No	I	ESCC
49	S199	Male	88	Ⅰ	No	No	I	ESCC
50	S164	Male	57	Ⅰ	No	No	I	ESCC
51	S356	Male	72	Ⅰ	No	No	I	ESCC
52	S143	Female	56	Ⅰ	No	No	I	ESCC
53	S60	Male	53	Ⅰ	Yes	No	I	ESCC
54	S91	Female	56	Ⅰ	No	No	I	ESCC
55	S182	Female	59	Ⅰ	No	No	I	ESCC
56	S125	Male	61	Ⅰ	No	No	I	ESCC
57	S146	Male	57	Ⅰ	No	No	I	ESCC
58	S56	Male	58	Ⅰ	No	No	I	ESCC
59	S138	Male	60	Ⅰ	No	No	I	ESCC
60	S104	Male	72	Ⅰ	Yes	Yes	I	ESCC
61	S259	Female	67	Ⅰ	No	No	I	ESCC
62	S206	Female	51	Ⅰ	No	No	I	ESCC
63	S342	Male	69	Ⅰ	Yes	No	I	ESCC
64	S102	Male	58	Ⅰ	No	No	I	ESCC
65	S239	Male	77	Ⅰ	Yes	No	I	ESCC
66	S159	Male	64	Ⅰ	Yes	Yes	I	ESCC
67	S169	Male	47	Ⅰ	Yes	No	I	ESCC
68	S293	Female	67	Ⅰ	No	No	I	ESCC
69	S121	Female	54	Ⅰ	No	No	I	ESCC
70	S230	Male	47	Ⅰ	Yes	No	I	ESCC
71	S361	Female	64	Ⅰ	No	No	I	ESCC
72	S288	Male	58	Ⅰ	No	No	I	ESCC
73	S287	Male	66	Ⅰ	No	Yes	I	ESCC
74	S282	Male	63	Ⅰ	Yes	No	I	ESCC
75	S338	Male	48	Ⅰ	No	No	I	ESCC
76	S307	Male	41	Ⅰ	Yes	Yes	I	ESCC
77	S04	Male	57	Ⅱ	No	No	I	ESCC
78	S30	Male	77	Ⅱ	No	No	I	ESCC
79	S32	Male	57	Ⅱ	Yes	No	I	ESCC
80	S196	Male	75	Ⅱ	No	No	I	ESCC
81	S53	Male	67	Ⅱ	Yes	No	I	ESCC
82	S283	Male	53	Ⅱ	Yes	No	I	ESCC
83	S03	Male	59	Ⅱ	Yes	Yes	I	ESCC
84	S305	Male	57	Ⅱ	No	No	I	ESCC
85	S33	Female	59	Ⅱ	No	No	I	ESCC
86	S337	Male	47	Ⅱ	Yes	No	I	ESCC
87	S99	Male	60	Ⅱ	No	No	I	ESCC
88	S72	Male	56	Ⅱ	Yes	Yes	I	ESCC
89	S170	Male	57	Ⅱ	No	No	I	ESCC
90	S166	Male	69	Ⅱ	Yes	No	I	ESCC
91	S224	Female	53	Ⅱ	No	No	I	ESCC
92	S22	Male	60	Ⅱ	No	No	I	ESCC
93	S162	Female	71	Ⅱ	No	No	I	ESCC
94	S313	Female	60	Ⅱ	No	No	I	ESCC
95	S40	Male	66	Ⅱ	No	No	I	ESCC
96	S09	Male	51	Ⅱ	Yes	Yes	I	ESCC
97	S29	Female	54	Ⅱ	No	No	I	ESCC
98	S119	Female	64	Ⅱ	No	No	I	ESCC
99	S187	Female	52	Ⅱ	No	No	I	ESCC
100	S198	Male	53	Ⅱ	Yes	No	I	ESCC
101	S203	Male	73	Ⅱ	No	No	I	ESCC
102	S87	Male	66	Ⅱ	Yes	No	I	ESCC
103	S191	Male	50	Ⅱ	No	No	I	ESCC
104	S70	Male	60	Ⅱ	Yes	Yes	I	ESCC
105	S54	Male	52	Ⅱ	Yes	No	I	ESCC
106	S55	Female	61	Ⅱ	No	No	I	ESCC
107	S69	Male	51	Ⅱ	No	Yes	I	ESCC
108	S183	Male	49	Ⅱ	No	No	I	ESCC
109	S214	Female	32	Ⅱ	No	No	I	ESCC
110	S47	Male	64	Ⅱ	Yes	Yes	I	ESCC
111	S260	Male	43	Ⅱ	Yes	No	I	ESCC
112	S181	Male	59	Ⅱ	Yes	No	I	ESCC
113	S127	Female	64	Ⅱ	No	No	I	ESCC
114	S168	Male	47	Ⅱ	Yes	Yes	I	ESCC
115	S140	Male	58	Ⅱ	No	No	I	ESCC
116	S268	Male	65	Ⅱ	Yes	No	I	ESCC
117	S156	Female	56	Ⅱ	No	No	I	ESCC
118	S340	Male	51	Ⅱ	Yes	No	I	ESCC
119	S375	Male	70	Ⅱ	Yes	No	I	ESCC
120	S108	Male	68	Ⅱ	Yes	No	I	ESCC
121	S18	Male	55	Ⅱ	No	No	I	ESCC
122	S215	Male	51	Ⅱ	No	No	I	ESCC
123	S365	Male	68	Ⅱ	Yes	No	I	ESCC
124	S42	Male	48	Ⅱ	Yes	Yes	I	ESCC
125	S285	Male	61	Ⅱ	No	No	I	ESCC
126	S279	Female	62	Ⅱ	No	No	I	ESCC
127	S389	Male	66	Ⅱ	No	No	I	ESCC
128	S326	Female	41	Ⅱ	No	No	I	ESCC
129	S286	Female	64	Ⅱ	No	No	I	ESCC
130	S49	Male	65		No	No	I	EBL
131	S61	Male	59		Yes	No	I	EBL
132	S65	Male	66		No	No	I	EBL
133	S66	Female	60		No	No	I	EBL
134	S67	Male	61		Yes	Yes	I	EBL
135	S71	Male	53		Yes	No	I	EBL
136	S73	Male	42		No	No	I	EBL
137	S76	Female	65		No	No	I	EBL
138	S77	Male	52		No	No	I	EBL
139	S78	Male	53		Yes	Yes	I	EBL
140	S80	Male	65		No	No	I	EBL
141	S81	Male	64		No	No	I	EBL
142	S97	Male	42		Yes	No	I	EBL
143	S98	Female	44		No	No	I	EBL
144	S109	Female	66		No	No	I	EBL
145	S112	Female	61		No	No	I	EBL
146	S115	Male	57		Yes	No	I	EBL
147	S116	Female	60		No	No	I	EBL
148	S118	Male	55		Yes	No	I	EBL
149	S124	Male	56		Yes	Yes	I	EBL
150	S131	Male	52		No	No	I	EBL
151	S132	Male	59		No	No	I	EBL
152	S141	Male	64		Yes	No	I	EBL
153	S142	Female	50		No	No	I	EBL
154	S145	Female	50		No	No	I	EBL
155	S149	Male	62		Yes	No	I	EBL
156	S161	Male	66		No	Yes	I	EBL
157	S163	Male	63		No	No	I	EBL
158	S174	Female	55		No	No	I	EBL
159	S177	Male	67		No	No	I	EBL
160	S178	Male	68		Yes	No	I	EBL
161	S179	Male	44		Yes	No	I	EBL
162	S186	Male	51		No	No	I	EBL
163	S189	Male	57		Yes	No	I	EBL
164	S194	Female	60		No	No	I	EBL
165	S195	Male	79		No	No	I	EBL
166	S202	Male	37		No	No	I	EBL
167	S207	Male	53		No	No	I	EBL
168	S210	Female	67		No	No	I	EBL
169	S216	Male	48		No	No	I	EBL
170	S219	Male	62		Yes	Yes	I	EBL
171	S221	Female	75		No	No	I	EBL
172	S222	Male	48		No	No	I	EBL
173	S226	Female	65		No	No	I	EBL
174	S227	Male	50		Yes	No	I	EBL
175	S234	Female	76		No	No	I	EBL
176	S235	Male	52		Yes	Yes	I	EBL
177	S238	Male	32		No	No	I	EBL
178	S243	Male	68		Yes	Yes	I	EBL
179	S245	Male	49		Yes	Yes	I	EBL
180	S345	Male	44		No	No	I	EBL
181	S346	Female	56		No	No	I	EBL
182	S347	Male	50		No	No	I	EBL
183	S348	Male	67		Yes	No	I	EBL
184	S354	Female	50		No	No	I	EBL
185	S355	Female	65		No	No	I	EBL
186	S359	Female	69		No	No	I	EBL
187	S367	Male	56		Yes	Yes	I	EBL
188	S369	Male	70		Yes	Yes	I	EBL
189	S380	Female	35		No	No	I	EBL
190	S381	Female	36		No	No	I	EBL
191	S384	Male	67		No	No	I	EBL
192	S386	Female	59		No	No	I	EBL
193	S397	Male	56		Yes	No	I	EBL
194	S408	Female	49		No	No	I	EBL
195	S90	Male	60		Yes	No	I	EBL
196	S63	Male	65		No	No	I	EBL
197	S420	Female	44		No	No	I	EBL
198	S413	Female	66		No	No	I	EBL
199	S411	Female	61		No	No	I	EBL
200	S404	Female	60		No	No	I	EBL
201	S400	Female	50		No	No	I	EBL
202	S398	Female	50		No	No	I	EBL
203	S392	Female	55		No	No	I	EBL
204	S390	Female	60		No	No	I	EBL
205	S370	Female	67		No	No	I	EBL
206	S368	Female	75		No	No	I	EBL
207	S368	Female	65		No	No	I	EBL
208	S366	Female	76		No	No	I	EBL
209	S362	Male	56		Yes	Yes	I	EBL
210	S358	Male	50		No	No	I	EBL
211	S351	Male	65		Yes	No	I	EBL
212	S349	Female	69		No	No	I	EBL
213	S344	Male	35		Yes	No	I	EBL
214	S339	Male	36		Yes	Yes	I	EBL
215	S332	Male	59		No	No	I	EBL
216	S331	Male	49		Yes	No	I	EBL
217	S330	Male	65		No	No	I	EBL
218	S329	Female	59		No	No	I	EBL
219	S327	Male	66		No	No	I	EBL
220	S324	Male	61		Yes	Yes	I	EBL
221	S323	Male	53		No	No	I	EBL
222	S319	Male	42		Yes	No	I	EBL
223	S318	Female	52		No	No	I	EBL
224	S317	Female	53		No	No	I	EBL
225	S315	Male	65		Yes	No	I	EBL
226	S312	Male	64		No	No	I	EBL
227	S311	Male	42		No	No	I	EBL
228	S304	Male	57		Yes	No	I	EBL
229	S303	Male	55		Yes	No	I	EBL
230	S298	Male	56		No	No	I	EBL
231	S296	Male	52		Yes	No	I	EBL
232	S295	Female	59		No	No	I	EBL
233	S294	Male	64		Yes	Yes	I	EBL
234	S292	Male	62		No	No	I	EBL
235	S291	Male	66		Yes	No	I	EBL
236	S290	Male	63		No	No	I	EBL
237	S289	Female	67		No	No	I	EBL
238	S284	Female	68		No	No	I	EBL
239	S281	Male	44		Yes	No	I	EBL
240	S276	Female	51		No	No	I	EBL
241	S275	Male	57		Yes	No	I	EBL
242	S271	Male	79		No	No	I	EBL
243	S270	Male	37		No	Yes	I	EBL
244	S265	Male	53		No	No	I	EBL
245	S264	Male	48		Yes	No	I	EBL
246	S263	Male	62		No	Yes	I	EBL
247	S261	Male	48		No	No	I	EBL
248	S258	Male	50		Yes	Yes	I	EBL
249	S251	Male	52		Yes	No	I	EBL
250	S211	Female	32		No	No	I	EBL
251	S204	Male	68		No	Yes	I	EBL
252	S197	Female	49		No	No	I	EBL
253	S193	Male	44		No	Yes	I	EBL
254	S180	Male	50		Yes	No	I	EBL
255	S152	Male	67		No	No	I	EBL
256	S123	Male	56		No	No	I	EBL
257	S113	Male	70		Yes	No	I	EBL
258	S111	Male	67		No	Yes	I	EBL
259	S106	Male	56		Yes	No	I	EBL
260	N142	Male	58		Yes	No	I	Healthy
261	N143	Female	60		No	No	I	Healthy
262	N144	Male	55		No	No	I	Healthy
263	N145	Female	48		No	No	I	Healthy
264	N146	Male	35		Yes	Yes	I	Healthy
265	N147	Male	32		Yes	No	I	Healthy
266	N148	Male	51		No	No	I	Healthy
267	N149	Male	51		No	No	I	Healthy
268	N150	Male	66		No	No	I	Healthy
269	N151	Male	75		Yes	Yes	I	Healthy
270	N152	Male	78		No	No	I	Healthy
271	N154	Male	59		Yes	No	I	Healthy
272	N155	Female	63		No	No	I	Healthy
273	N157	Male	54		No	No	I	Healthy
274	N158	Male	55		No	No	I	Healthy
275	N159	Male	53		No	No	I	Healthy
276	N161	Male	51		Yes	No	I	Healthy
277	N162	Male	70		No	No	I	Healthy
278	N163	Male	56		Yes	No	I	Healthy
279	N164	Male	62		Yes	Yes	I	Healthy
280	N165	Female	58		No	No	I	Healthy
281	N166	Female	61		No	No	I	Healthy
282	N167	Male	68		Yes	No	I	Healthy
283	N168	Male	71		No	No	I	Healthy
284	N169	Female	52		No	No	I	Healthy
285	N170	Female	74		No	No	I	Healthy
286	N171	Male	58		Yes	Yes	I	Healthy
287	N173	Male	60		No	No	I	Healthy
288	N174	Male	72		No	No	I	Healthy
289	N175	Male	66		Yes	No	I	Healthy
290	N176	Female	64		No	No	I	Healthy
291	N179	Male	64		Yes	No	I	Healthy
292	N180	Female	51		No	No	I	Healthy
293	N181	Female	50		No	No	I	Healthy
294	N182	Male	57		Yes	No	I	Healthy
295	N183	Male	64		No	No	I	Healthy
296	N185	Male	62		No	No	I	Healthy
297	N187	Female	58		No	No	I	Healthy
298	N189	Female	69		No	No	I	Healthy
299	N190	Male	64		No	No	I	Healthy
300	N192	Male	42		Yes	Yes	I	Healthy
301	N193	Male	60		No	No	I	Healthy
302	N194	Female	43		No	No	I	Healthy
303	N195	Male	48		No	No	I	Healthy
304	N196	Male	57		Yes	No	I	Healthy
305	N197	Male	58		No	No	I	Healthy
306	N198	Male	44		Yes	Yes	I	Healthy
307	N199	Male	55		No	No	I	Healthy
308	N200	Male	44		Yes	Yes	I	Healthy
309	N201	Male	62		Yes	Yes	I	Healthy
310	N202	Male	56		No	No	I	Healthy
311	N203	Male	53		No	No	I	Healthy
312	N205	Female	55		No	No	I	Healthy
313	N206	Male	57		Yes	No	I	Healthy
314	N207	Female	62		No	No	I	Healthy
315	N208	Female	52		No	No	I	Healthy
316	N209	Male	56		No	No	I	Healthy
317	N210	Male	66		Yes	Yes	I	Healthy
318	N211	Male	61		Yes	Yes	I	Healthy
319	N213	Male	63		No	No	I	Healthy
320	N214	Male	56		No	No	I	Healthy
321	N215	Male	46		Yes	No	I	Healthy
322	N216	Male	65		No	No	I	Healthy
323	N217	Male	53		Yes	No	I	Healthy
324	N218	Male	54		No	No	I	Healthy
325	N219	Male	64		Yes	No	I	Healthy
326	N220	Female	48		No	No	I	Healthy
327	N221	Male	61		No	No	I	Healthy
328	N222	Male	53		No	No	I	Healthy
329	N223	Female	50		No	No	I	Healthy
330	N224	Male	52		No	No	I	Healthy
331	N225	Male	55		No	No	I	Healthy
332	N226	Male	60		No	No	I	Healthy
333	N227	Female	63		No	No	I	Healthy
334	N228	Female	48		No	No	I	Healthy
335	N229	Male	60		No	No	I	Healthy
336	N231	Male	54		Yes	Yes	I	Healthy
337	N232	Female	51		No	No	I	Healthy
338	N233	Female	62		No	No	I	Healthy
339	N234	Female	63		No	No	I	Healthy
340	N235	Female	61		No	No	I	Healthy
341	N237	Male	64		Yes	No	I	Healthy
342	N238	Male	63		No	No	I	Healthy
343	N239	Male	56		Yes	No	I	Healthy
344	N240	Male	56		Yes	Yes	I	Healthy
345	N241	Male	60		No	No	I	Healthy
346	N242	Male	60		Yes	No	I	Healthy
347	N243	Female	61		No	No	I	Healthy
348	N244	Male	57		No	No	I	Healthy
349	N245	Male	66		No	No	I	Healthy
350	N246	Male	53		Yes	Yes	I	Healthy
351	N247	Male	51		Yes	No	I	Healthy
352	N249	Female	61		No	No	I	Healthy
353	N250	Female	65		No	No	I	Healthy
354	N251	Male	50		No	No	I	Healthy
355	N252	Male	68		Yes	Yes	I	Healthy
356	N254	Male	55		No	No	I	Healthy
357	N255	Female	62		No	No	I	Healthy
358	N256	Male	55		Yes	No	I	Healthy
359	N257	Female	50		No	No	I	Healthy
360	N258	Male	55		Yes	No	I	Healthy
361	N259	Female	56		No	No	I	Healthy
362	N260	Female	62		No	No	I	Healthy
363	N261	Male	46		Yes	Yes	I	Healthy
364	N262	Female	54		No	No	I	Healthy
365	N265	Female	53		Yes	No	I	Healthy
366	N266	Male	51		Yes	No	I	Healthy
367	N267	Female	49		No	No	I	Healthy
368	N268	Female	62		No	No	I	Healthy
369	N270	Female	68		No	No	I	Healthy
370	N273	Male	58		Yes	No	I	Healthy
371	N275	Male	50		Yes	No	I	Healthy
372	N276	Male	55		No	No	I	Healthy
373	N277	Male	55		No	Yes	I	Healthy
374	N278	Female	70		No	No	I	Healthy
375	N279	Male	50		Yes	No	I	Healthy
376	N280	Male	57		No	Yes	I	Healthy
377	N281	Female	56		No	No	I	Healthy
378	N282	Male	50		No	No	I	Healthy
379	N283	Female	54		No	No	I	Healthy
380	N284	Male	72		Yes	No	I	Healthy
381	N285	Female	74		No	Yes	I	Healthy
382	N286	Male	57		No	Yes	I	Healthy
383	N287	Female	53		No	No	I	Healthy
384	N288	Male	56		Yes	No	I	Healthy
385	N289	Male	70		No	No	I	Healthy
386	N290	Male	51		Yes	Yes	I	Healthy
387	N291	Female	62		No	No	I	Healthy
388	N292	Female	50		No	No	I	Healthy
389	N293	Male	59		Yes	No	I	Healthy
390	N295	Female	71		No	No	I	Healthy
391	N297	Male	57		No	No	I	Healthy
392	N298	Male	56		No	No	I	Healthy
393	N300	Male	55		No	No	I	Healthy
394	N301	Male	49		No	No	I	Healthy
395	N302	Male	54		Yes	Yes	I	Healthy
396	N303	Female	57		No	No	I	Healthy
397	N304	Male	59		No	No	I	Healthy
398	N306	Female	56		No	No	I	Healthy
399	N307	Male	54		No	No	I	Healthy
400	N308	Male	61		No	No	I	Healthy
401	N309	Female	55		No	No	I	Healthy
402	N310	Male	56		Yes	No	I	Healthy
403	N311	Male	77		No	No	I	Healthy
404	N312	Male	67		No	No	I	Healthy
405	N313	Female	55		No	No	I	Healthy
406	N314	Male	52		No	No	I	Healthy
407	N315	Male	58		No	No	I	Healthy
408	N316	Male	63		Yes	No	I	Healthy
409	N317	Female	74		No	No	I	Healthy
410	S500	Male	60	0	Yes	Yes	II & III	ESCC
411	S507	Female	48	0	No	No	II & III	ESCC
412	S512	Male	65	0	Yes	No	II & III	ESCC
413	S519	Male	48	0	Yes	No	II & III	ESCC
414	S504	Male	70	0	Yes	Yes	II & III	ESCC
415	S515	Female	55	0	No	No	II & III	ESCC
416	S525	Male	61	0	Yes	No	II & III	ESCC
417	S531	Female	56	0	No	No	II & III	ESCC
418	S528	Male	57	0	No	No	II & III	ESCC
419	S530	Male	56	0	Yes	No	II & III	ESCC
420	S505	Female	59	0	No	No	II & III	ESCC
421	S509	Male	59	0	No	No	II & III	ESCC
422	S552	Male	42	0	No	No	II & III	ESCC
423	S532	Female	62	0	No	No	II & III	ESCC
424	S543	Male	66	0	Yes	Yes	II & III	ESCC
425	S540	Male	53	0	No	No	II & III	ESCC
426	S510	Female	58	0	No	No	II & III	ESCC
427	S534	Male	57	0	Yes	No	II & III	ESCC
428	S526	Male	43	0	No	No	II & III	ESCC
429	S527	Male	64	Ⅰ	No	No	II & III	ESCC
430	S524	Male	51	Ⅰ	No	No	II & III	ESCC
431	S511	Male	56	Ⅰ	No	No	II & III	ESCC
432	S513	Female	67	Ⅰ	No	No	II & III	ESCC
433	S535	Male	52	Ⅰ	Yes	Yes	II & III	ESCC
434	S516	Male	58	Ⅰ	No	No	II & III	ESCC
435	S514	Female	76	Ⅰ	No	No	II & III	ESCC
436	S539	Male	44	Ⅰ	No	No	II & III	ESCC
437	S517	Male	57	Ⅰ	Yes	No	II & III	ESCC
438	S536	Female	43	Ⅰ	No	No	II & III	ESCC
439	S520	Male	52	Ⅰ	No	No	II & III	ESCC
440	S538	Male	45	Ⅰ	No	No	II & III	ESCC
441	S518	Male	35	Ⅰ	No	No	II & III	ESCC
442	S537	Male	87	Ⅰ	Yes	Yes	II & III	ESCC
443	S542	Female	55	Ⅱ	No	No	II & III	ESCC
444	S529	Male	59	Ⅱ	No	No	II & III	ESCC
445	S533	Male	45	Ⅱ	Yes	No	II & III	ESCC
446	S551	Female	66	Ⅱ	No	No	II & III	ESCC
447	S541	Female	46	Ⅱ	No	No	II & III	ESCC
448	S545	Male	56	Ⅱ	Yes	No	II & III	ESCC
449	S501	Male	43	Ⅱ	No	No	II & III	ESCC
450	S503	Female	57	Ⅱ	No	No	II & III	ESCC
451	S544	Male	66	Ⅱ	Yes	No	II & III	ESCC
452	S506	Female	52	Ⅱ	No	No	II & III	ESCC
453	S523	Male	63	Ⅱ	No	No	II & III	ESCC
454	S521	Female	60	Ⅱ	Yes	Yes	II & III	ESCC
455	S546	Male	56	Ⅱ	Yes	No	II & III	ESCC
456	S502	Male	47	Ⅱ	No	No	II & III	ESCC
457	S549	Male	64	Ⅱ	Yes	Yes	II & III	ESCC
458	S508	Female	44	Ⅱ	No	No	II & III	ESCC
459	S548	Male	65	Ⅱ	Yes	No	II & III	ESCC
460	S522	Male	40		Yes	Yes	II & III	EBL
461	S604	Female	31		No	No	II & III	EBL
462	S559	Male	52		Yes	No	II & III	EBL
463	S611	Male	58		Yes	No	II & III	EBL
464	S564	Female	53		No	No	II & III	EBL
465	S555	Female	54		No	No	II & III	EBL
466	S547	Male	49		Yes	Yes	II & III	EBL
467	S589	Male	57		No	No	II & III	EBL
468	S581	Female	41		No	No	II & III	EBL
469	S550	Male	59		Yes	No	II & III	EBL
470	S562	Male	31		No	No	II & III	EBL
471	S571	Female	59		No	No	II & III	EBL
472	S566	Male	58		Yes	No	II & III	EBL
473	S584	Female	46		No	No	II & III	EBL
474	S553	Female	54		No	No	II & III	EBL
475	S563	Male	61		Yes	No	II & III	EBL
476	S556	Male	41		No	No	II & III	EBL
477	S565	Male	66		No	No	II & III	EBL
478	S579	Female	65		No	No	II & III	EBL
479	S554	Male	59		Yes	No	II & III	EBL
480	S558	Female	58		No	No	II & III	EBL
481	S557	Male	66		No	No	II & III	EBL
482	S577	Male	55		Yes	No	II & III	EBL
483	S590	Male	47		No	No	II & III	EBL
484	S610	Female	62		No	No	II & III	EBL
485	S607	Male	56		Yes	Yes	II & III	EBL
486	S580	Female	56		No	No	II & III	EBL
487	S560	Female	67		No	No	II & III	EBL
488	S592	Male	42		No	No	II & III	EBL
489	S574	Male	63		Yes	No	II & III	EBL
490	S598	Female	60		No	No	II & III	EBL
491	S615	Male	76		No	No	II & III	EBL
492	S605	Male	62		Yes	Yes	II & III	EBL
493	S573	Male	54		No	No	II & III	EBL
494	S601	Female	63		No	No	II & III	EBL
495	S593	Female	66		No	No	II & III	EBL
496	S594	Male	58		Yes	No	II & III	EBL
497	S569	Male	56		No	No	II & III	EBL
498	S608	Female	43		No	No	II & III	EBL
499	S603	Male	56		No	No	II & III	EBL
500	S602	Male	67		No	No	II & III	EBL
501	S618	Male	54		Yes	Yes	II & III	EBL
502	S614	Female	60		No	No	II & III	EBL
503	S570	Male	76		No	No	II & III	EBL
504	S612	Male	67		No	No	II & III	EBL
505	S619	Male	48		No	No	II & III	EBL
506	S572	Female	60		No	No	II & III	EBL
507	S622	Male	56		Yes	Yes	II & III	EBL
508	S582	Male	44		No	No	II & III	EBL
509	S623	Male	59		Yes	No	II & III	EBL
510	N1	Female	30		No	No	II & III	Healthy
511	N2	Male	52		Yes	No	II & III	Healthy
512	N3	Male	45		Yes	Yes	II & III	Healthy
513	N4	Female	65		No	No	II & III	Healthy
514	N5	Female	46		No	No	II & III	Healthy
515	N6	Male	64		Yes	No	II & III	Healthy
516	N7	Male	31		No	No	II & III	Healthy
517	N8	Female	53		No	No	II & III	Healthy
518	N9	Female	66		No	No	II & III	Healthy
519	N10	Male	30		Yes	No	II & III	Healthy
520	N11	Male	67		No	No	II & III	Healthy
521	N12	Female	45		No	No	II & III	Healthy
522	N13	Male	53		Yes	No	II & III	Healthy
523	N14	Female	54		No	No	II & III	Healthy
524	N15	Male	47		No	No	II & III	Healthy
525	N16	Male	44		Yes	Yes	II & III	Healthy
526	N17	Female	47		No	No	II & III	Healthy
527	N18	Female	61		No	No	II & III	Healthy
528	N19	Male	46		No	No	II & III	Healthy
529	N20	Male	56		No	No	II & III	Healthy
530	N21	Male	67		Yes	No	II & III	Healthy
531	N22	Female	57		No	No	II & III	Healthy
532	N23	Female	61		No	No	II & III	Healthy
533	N24	Male	55		No	No	II & III	Healthy
534	N25	Male	45		No	No	II & III	Healthy
535	N26	Male	57		No	No	II & III	Healthy
536	N27	Male	66		No	No	II & III	Healthy
537	N28	Male	53		Yes	No	II & III	Healthy
538	N29	Female	62		No	No	II & III	Healthy
539	N30	Male	44		No	No	II & III	Healthy
540	N31	Male	67		Yes	Yes	II & III	Healthy
541	N32	Female	63		No	No	II & III	Healthy
542	N33	Female	58		No	No	II & III	Healthy
543	N34	Male	62		No	No	II & III	Healthy
544	N35	Male	68		No	No	II & III	Healthy
545	N36	Male	67		Yes	No	II & III	Healthy
546	N37	Male	55		No	No	II & III	Healthy
547	N38	Female	59		No	No	II & III	Healthy
548	N39	Female	66		No	No	II & III	Healthy
549	N40	Male	44		Yes	Yes	II & III	Healthy
550	N41	Male	48		No	No	II & III	Healthy
551	N42	Male	67		No	No	II & III	Healthy
552	N43	Male	72		Yes	No	II & III	Healthy
553	N44	Female	45		No	No	II & III	Healthy
554	N45	Male	59		No	No	II & III	Healthy
555	N46	Male	76		Yes	Yes	II & III	Healthy
556	N47	Male	66		No	No	II & III	Healthy
557	N48	Female	73		No	No	II & III	Healthy
558	N49	Male	62		Yes	No	II & III	Healthy
559	N50	Male	70		No	No	II & III	Healthy
560	N51	Male	45		Yes	No	II & III	Healthy
561	N52	Female	55		No	No	II & III	Healthy
562	N53	Male	65		No	No	II & III	Healthy
563	N54	Male	54		No	No	II & III	Healthy
564	N55	Male	76		Yes	Yes	II & III	Healthy
565	N56	Female	49		No	No	II & III	Healthy
566	N57	Male	59		No	No	II & III	Healthy
567	N58	Male	63		Yes	No	II & III	Healthy
568	N59	Male	56		No	No	II & III	Healthy
569	N60	Male	37		Yes	Yes	II & III	Healthy
